# Supplementary material for: A LoC-SERS platform based on triple signal amplification for highly sensitive detection of colorectal cancer miRNAs
Source: Royal Society of Chemistry journal article supplement (doi:10.1039/d3ay01006f), 2023-01-01
Supplement: d3ay01006f1.pdf [file d3ay01006f1.pdf]

# **LoC-SERS platform based on triple signal amplification for highly sensitive detection of colorectal cancer miRNAs**

Chun Dai<sup>1,2</sup>, Kun Wang<sup>3</sup>, Ming Tan<sup>2</sup>, Zhaolai Hua<sup>2</sup>, Lin Xia<sup>2</sup>, Lei Qin<sup>1\*</sup>

<sup>1</sup>Department of General Surgery, The First Affiliated Hospital of Soochow University,  
Suzhou, Jiangsu, China

<sup>2</sup>Department of General Surgery, The People's Hospital of Yangzhong City,  
Yangzhong, Jiangsu, China

<sup>3</sup>Department of General Surgery, The Affiliated Hospital of Jiangsu University,  
Zhenjiang, Jiangsu, China

\*Corresponding author: 18912118522@163.com

**Table S1.** Oligonucleotides used in the experiments

| Name      | Sequence (5' - 3')                                                           |
|-----------|------------------------------------------------------------------------------|
| miRNA-122 | UGG AGU GUG ACA AUG GUG UUU G                                                |
| miRNA-192 | CUG ACC UAU GAA UUG ACA GCC                                                  |
| MT1-1     | UGG ACU GUG ACA AUG GUG UUU G                                                |
| MT1-2     | CGG ACC UAU GAA UUG ACA GCC                                                  |
| MT3-1     | UCG AGU GUG AUA ACG GUG UUU G                                                |
| MT3-2     | CAG ACC UGU GAA UGG ACA GCC                                                  |
| hpDNA1-1  | ATG TGT TGC AGT CGA TGC TGA GGC AAA CAC CAT TGT CAC GTA GTG<br>CAA CA        |
| hpDNA1-2  | TCA GAT GTG ACT AGT GCT AGC TGA GGC TGT CAA TTC ATA CAT GTC<br>ACA T         |
| hpDNA2-1  | ACG TAA CAC CAT TGT CAC GAC CAT CGA CTT ATC GTG ACA ATG GTG<br>TTG CCT CA    |
| hpDNA2-2  | ACG GTC AAT TCA TAC ATG TAA TAG ACA TGC TAC ATG TAT GAA TTG<br>ACA GCC TCA   |
| hpDNA3-1  | CTA ACC ATC GAC TTA TAA CAC CAT TGT CAC GAT AAG TCG ATG GTC<br>GTG ACA ACG C |
| hpDNA3-1  | CTA ACC ATC GAC TTA TAA CAC CAT TGT CAC GAT AAG TCG ATG GTC<br>GTG ACA ACG C |
| DNA1-1    | ATG TGT TGC AGT CGA TGC                                                      |
| DNA1-2    | TCA GAT GTG ACT AGT GCT AGC                                                  |
| DNA2-1    | TGA GGC AAA CAC CAT TGT CAC GTA GTG CAA CA                                   |
| DNA2-2    | TGA GGC TGT CAA TTC ATA CAT GTC ACA T                                        |

**Table S2** Basic characteristics of the healthy subjects and colorectal cancer patients

| <b>Groups</b> | <b>Healthy subjects</b> | <b>Colorectal cancer</b> |
|---------------|-------------------------|--------------------------|
| Average age   | 34                      | 47                       |
| Gender        |                         |                          |
| Male          | 16                      | 18                       |
| Female        | 14                      | 12                       |
| Sample number | 30                      | 30                       |

**Table S3** The miR-122 and miR-192 concentration detected by SERS using the proposed platform and ELISA in colorectal cancer patients

| Samples | SERS (fM) |         | qRT-PCR (fM) |         |
|---------|-----------|---------|--------------|---------|
|         | miR-122   | miR-192 | miR-122      | miR-192 |
| 1       | 28.65     | 18.60   | 27.18        | 19.61   |
| 2       | 24.78     | 19.67   | 29.68        | 19.01   |
| 3       | 26.99     | 23.77   | 22.40        | 20.43   |
| 4       | 22.51     | 29.40   | 24.20        | 28.29   |
| 5       | 22.09     | 24.46   | 26.08        | 24.55   |
| 6       | 29.71     | 26.06   | 28.99        | 25.15   |
| 7       | 27.37     | 29.65   | 30.63        | 25.25   |
| 8       | 22.31     | 25.10   | 29.33        | 22.87   |
| 9       | 31.96     | 27.60   | 26.49        | 21.39   |
| 10      | 21.88     | 28.97   | 21.80        | 20.48   |
| 11      | 26.23     | 24.62   | 23.81        | 25.58   |
| 12      | 30.86     | 24.05   | 27.01        | 24.28   |
| 13      | 29.93     | 25.95   | 25.58        | 21.23   |
| 14      | 28.52     | 24.54   | 25.95        | 28.90   |
| 15      | 30.94     | 22.57   | 29.38        | 28.98   |
| 16      | 32.99     | 24.36   | 31.97        | 21.43   |
| 17      | 33.41     | 25.60   | 30.55        | 24.30   |
| 18      | 32.24     | 29.07   | 28.53        | 27.47   |
| 19      | 26.03     | 26.29   | 28.36        | 23.91   |
| 20      | 28.54     | 20.61   | 22.96        | 21.42   |
| 21      | 27.84     | 20.86   | 30.07        | 18.63   |
| 22      | 30.36     | 21.02   | 27.43        | 21.66   |
| 23      | 24.67     | 31.40   | 21.69        | 29.12   |
| 24      | 24.21     | 27.74   | 23.65        | 25.11   |
| 25      | 27.89     | 21.08   | 25.20        | 18.98   |
| 26      | 26.15     | 27.66   | 26.33        | 23.53   |
| 27      | 26.91     | 28.00   | 28.97        | 28.81   |
| 28      | 32.20     | 25.50   | 32.32        | 22.20   |
| 29      | 26.07     | 31.33   | 24.68        | 28.18   |
| 30      | 30.77     | 25.75   | 22.42        | 23.48   |

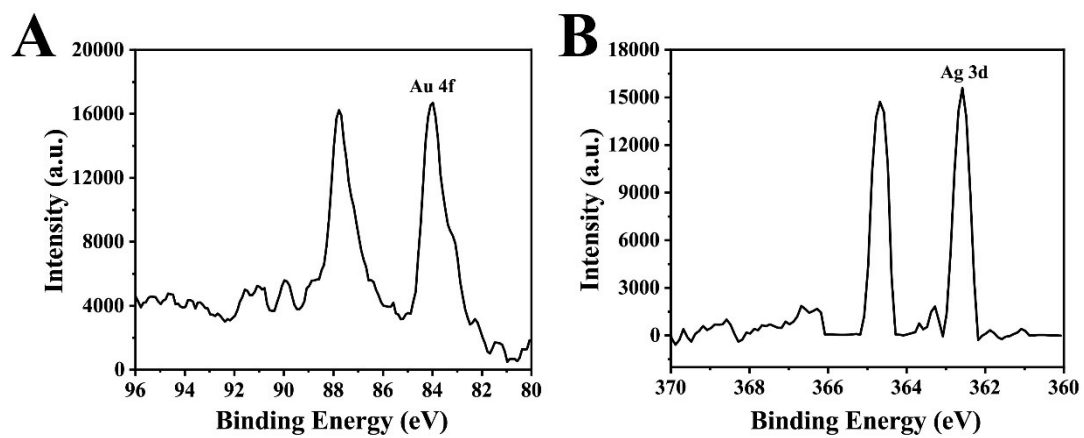

Fig. S1. XPS spectra of Au-AgNSs (a) high resolution Au 4f (b) high resolution Ag 3d.
